# Supplementary material for: Developmental 'awakening' of primary motor cortex to the sensory consequences of movement
Source: eLife journal article supplement (doi:10.7554/elife.41841), 2018-12-21
Supplement: supp [file elife-41841-supp-v1.zip]

Archive with 7 entries (7 files):
- elife_poa_e41841_Figure_1_figure_supplement_2.pdf
- elife_poa_e41841_Figure_3_figure_supplement_1.pdf
- elife_poa_e41841_Figure_8_figure_supplement_1.pdf
- elife_poa_e41841_Figure_3_figure_supplement_2.pdf
- elife_poa_e41841_Figure_1_figure_supplement_1.pdf
- elife_poa_e41841_Figure_6_figure_supplement_1.pdf
- elife_poa_e41841_Transparent_Reporting_File.pdf
