# Supplementary figures and images for: Developmental 'awakening' of primary motor cortex to the sensory consequences of movement
Source: eLife journal article supplement (doi:10.7554/elife.41841), 2018-12-21

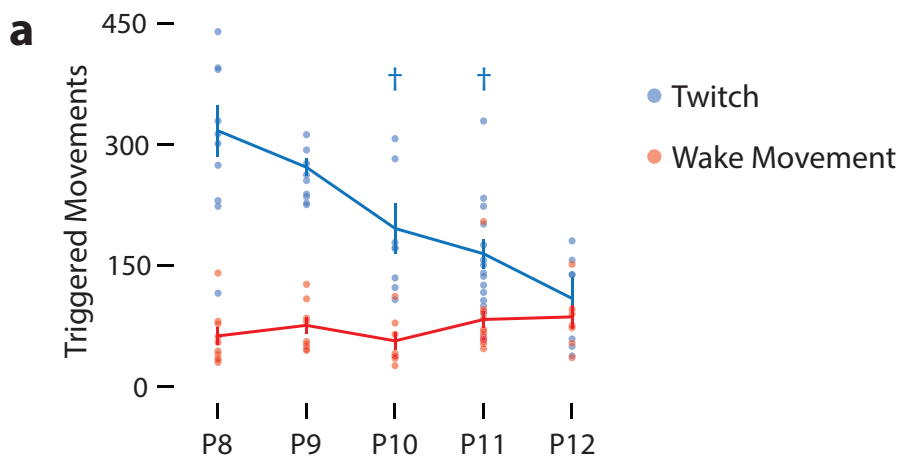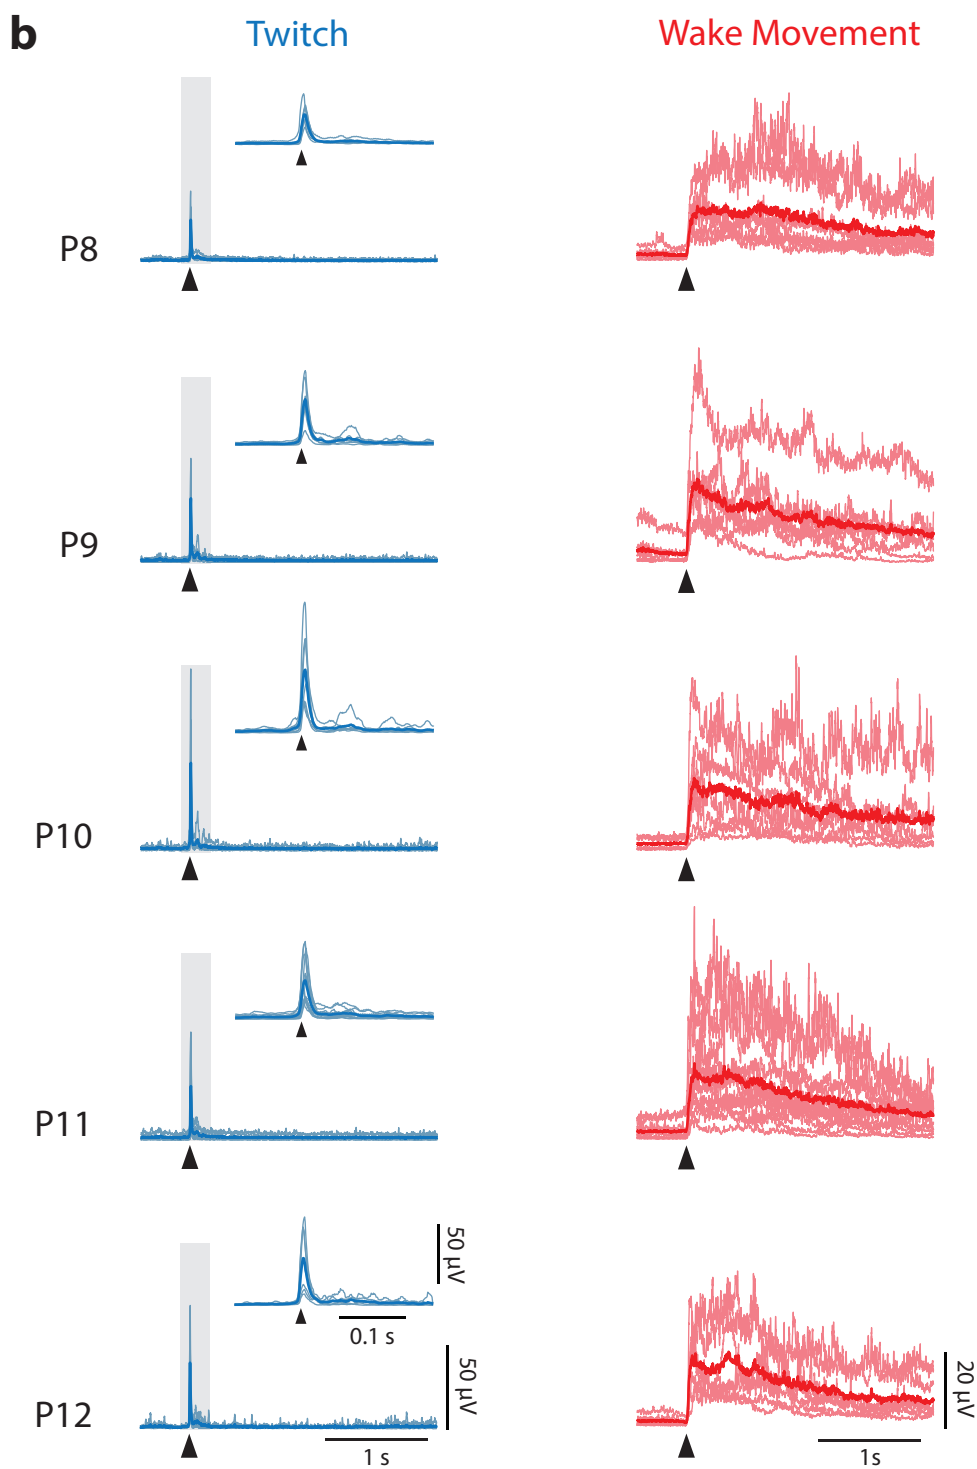

Supplement: supp [file elife-41841-supp-v1.zip › elife_poa_e41841_Figure_1_figure_supplement_2.pdf]

**a**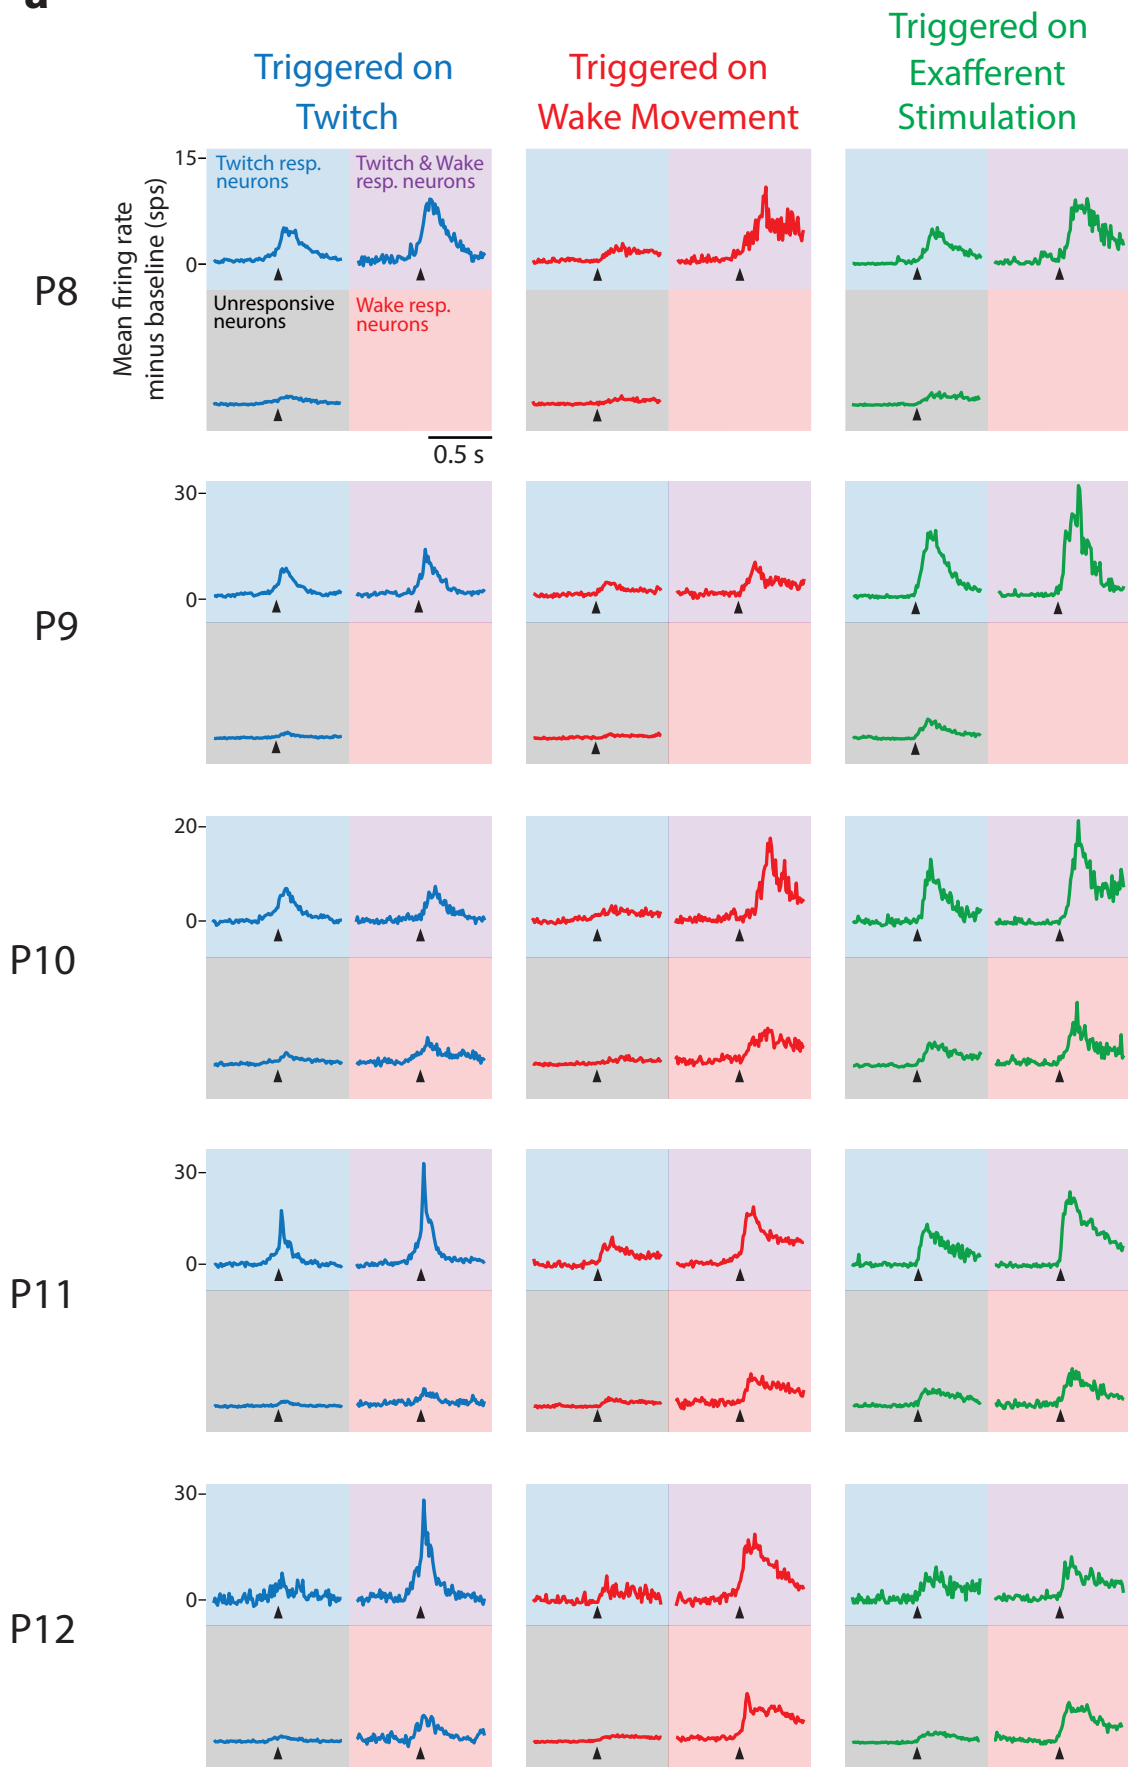**b**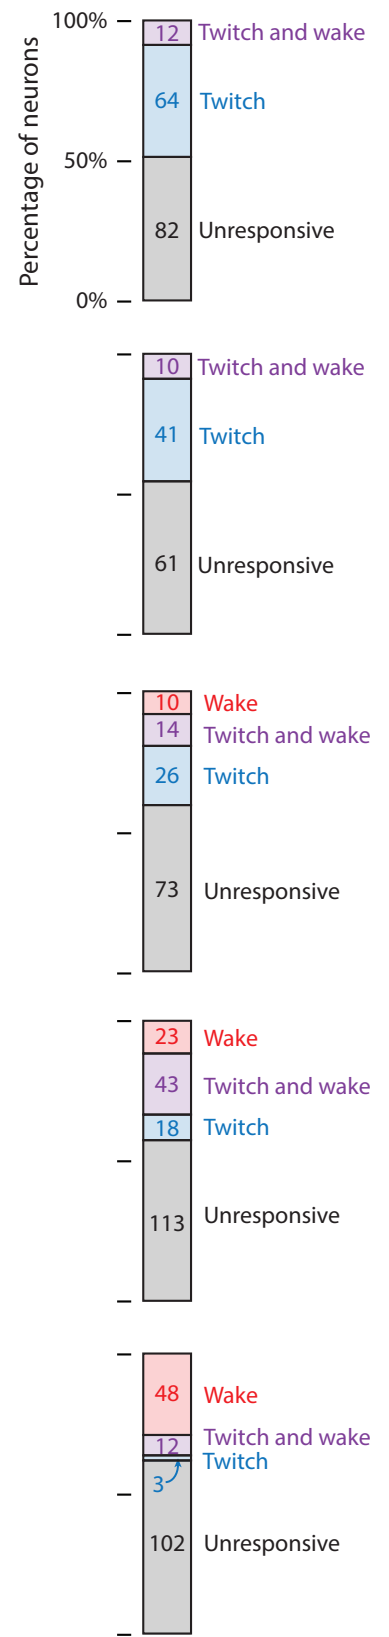

Supplement: supp [file elife-41841-supp-v1.zip › elife_poa_e41841_Figure_3_figure_supplement_1.pdf]

**a**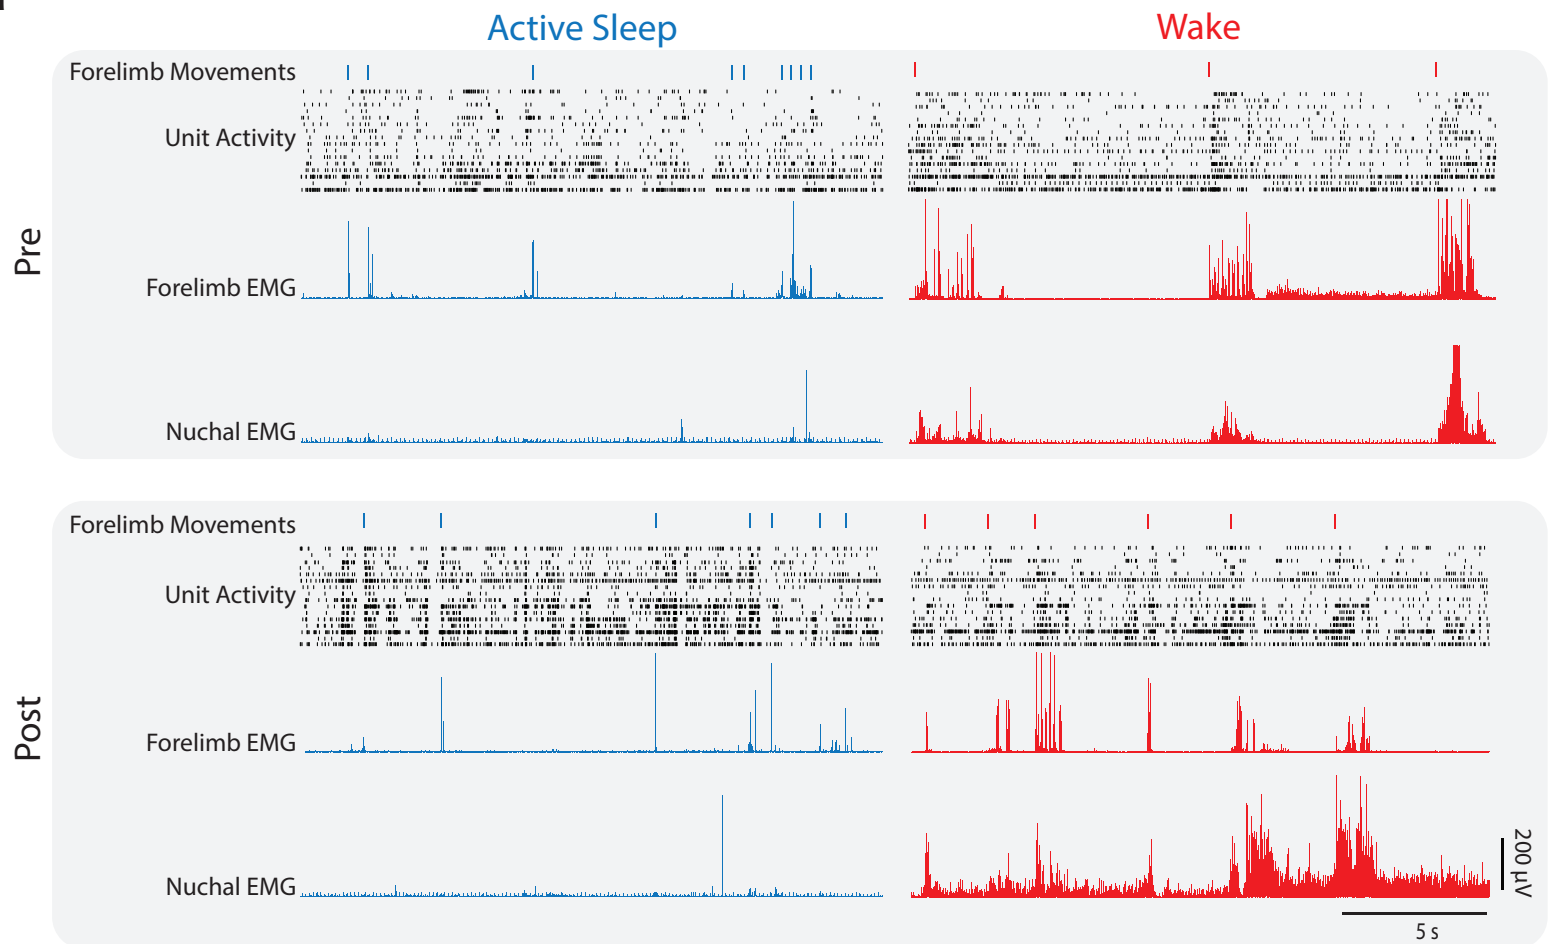**b**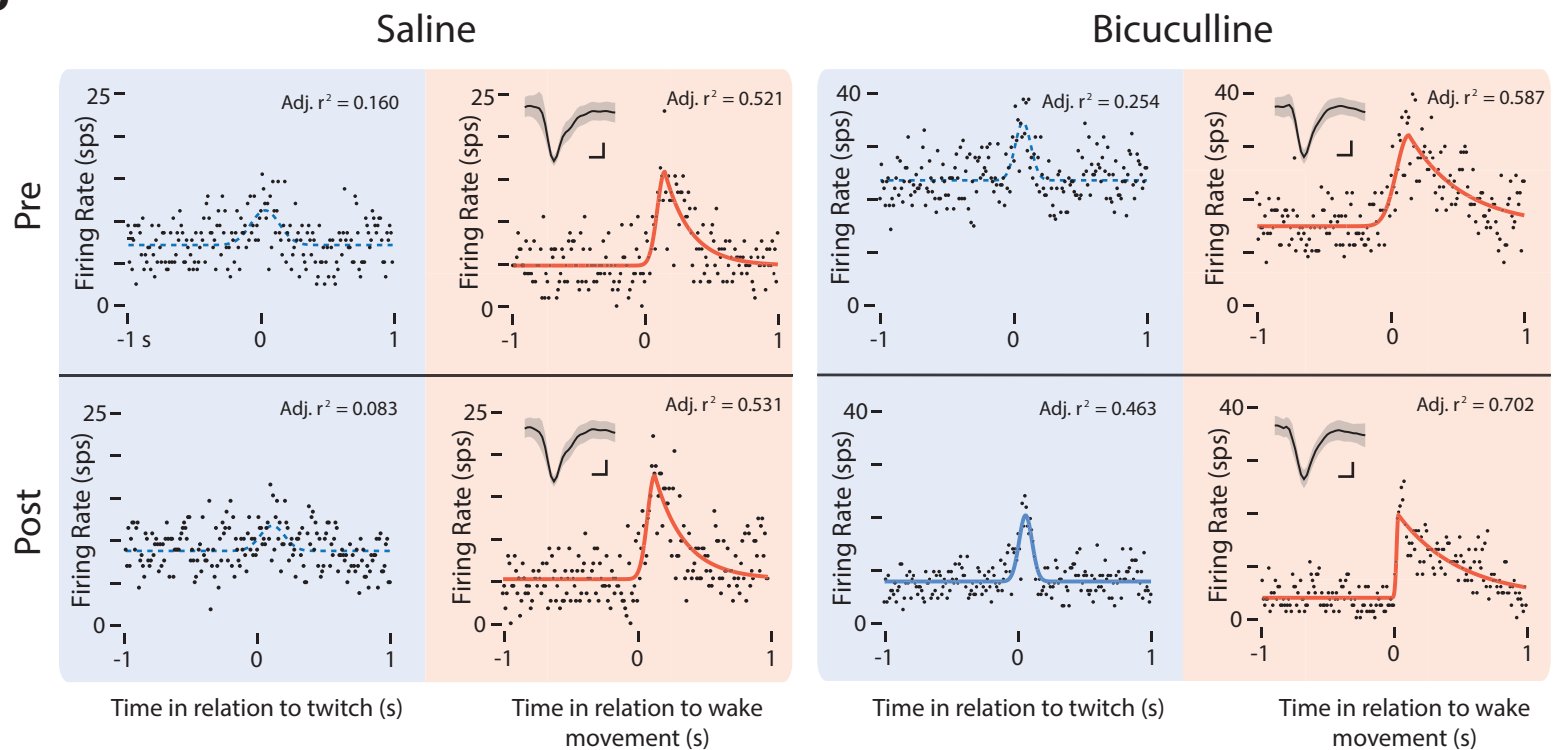

Supplement: supp [file elife-41841-supp-v1.zip › elife_poa_e41841_Figure_8_figure_supplement_1.pdf]

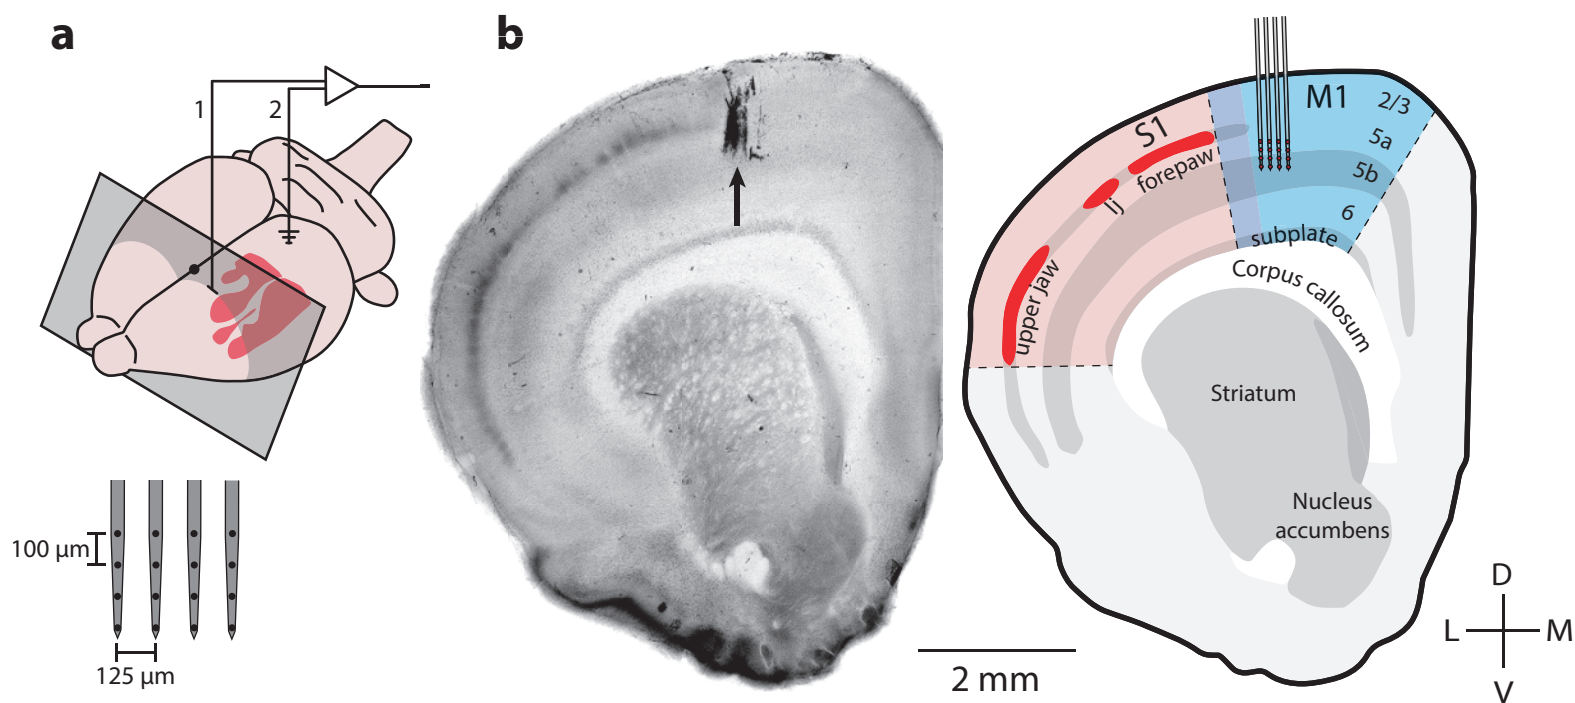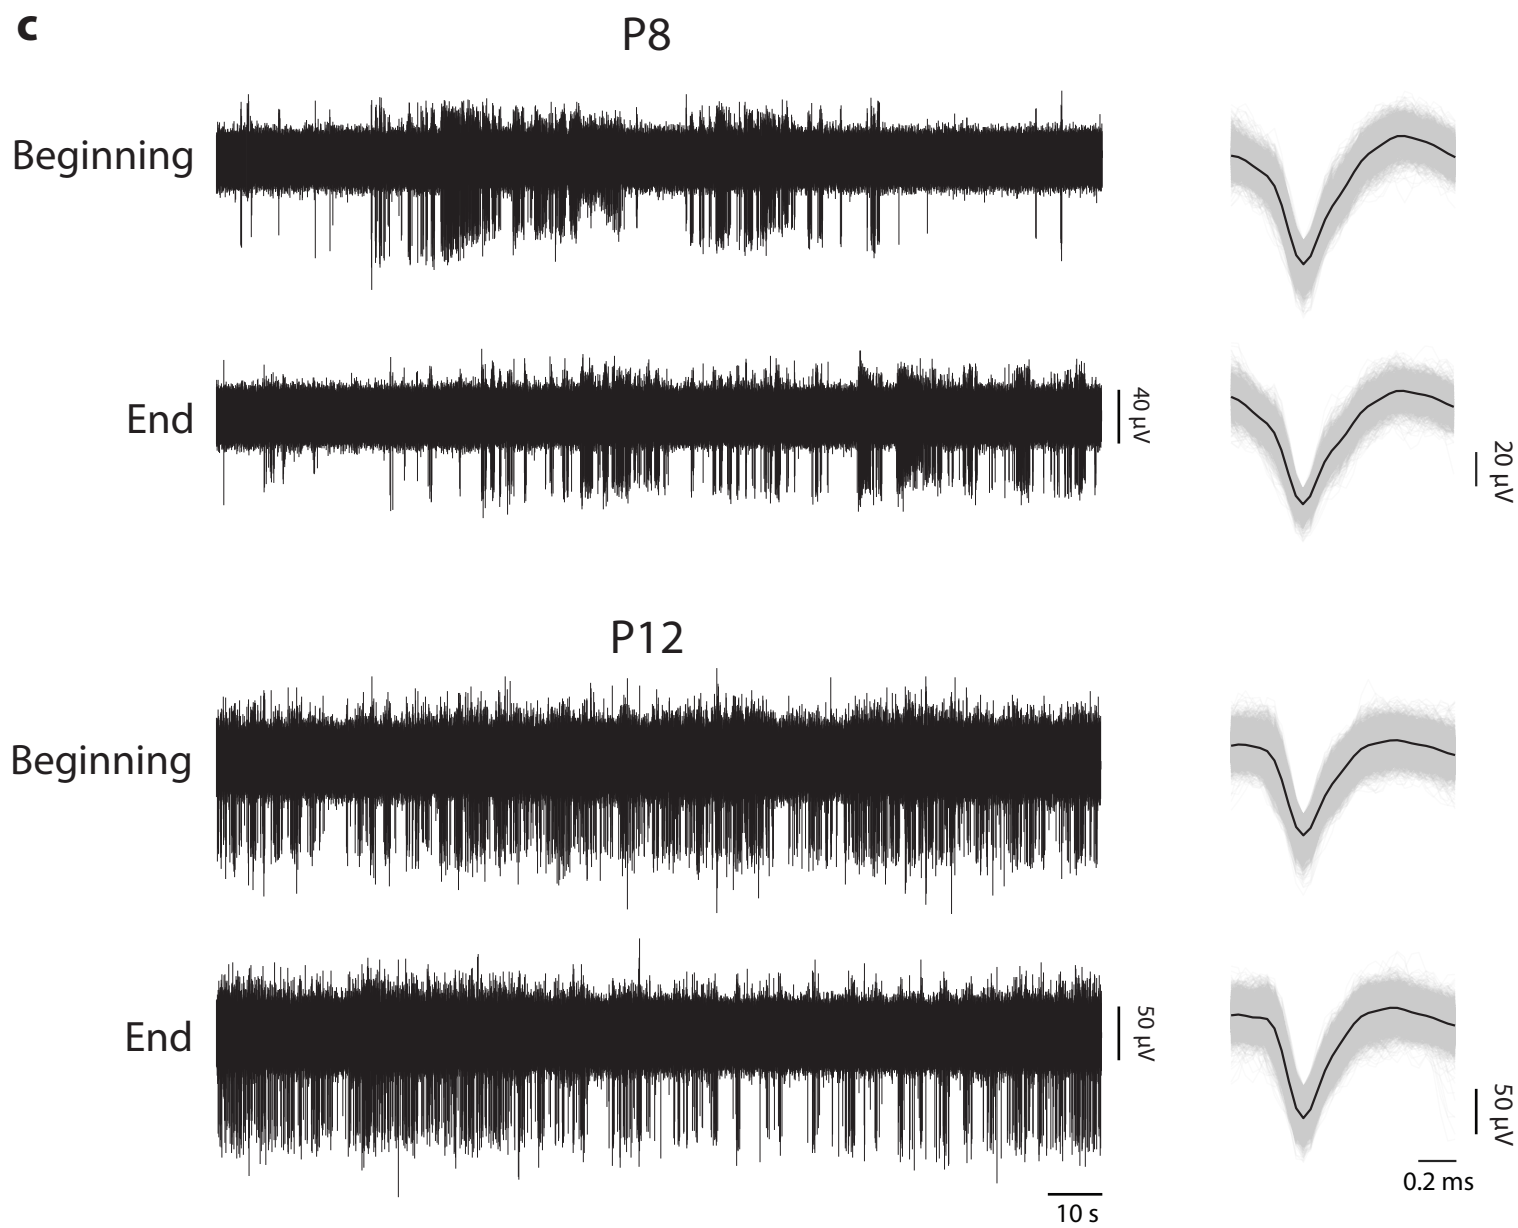

Supplement: supp [file elife-41841-supp-v1.zip › elife_poa_e41841_Figure_1_figure_supplement_1.pdf]

**a**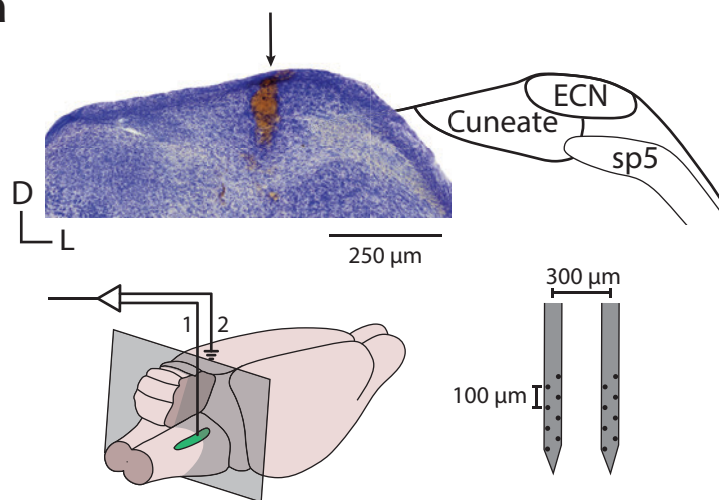**b**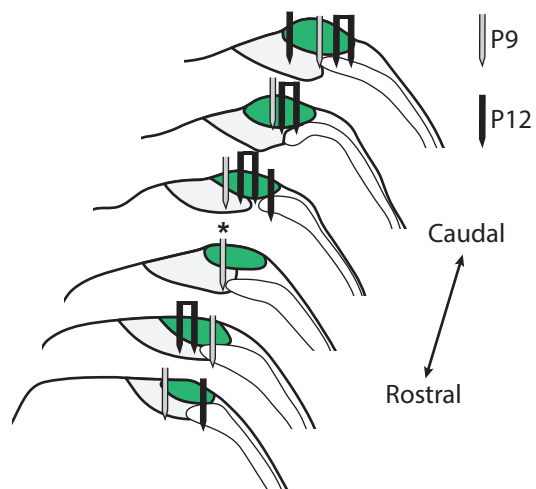**c**

## Representative ECN Neurons

P9

P12

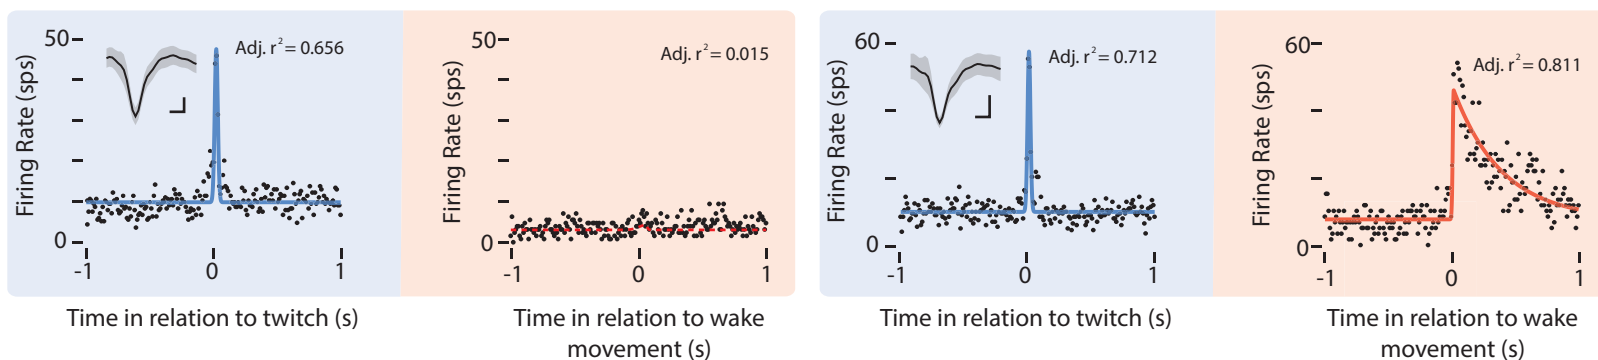**d**

P9

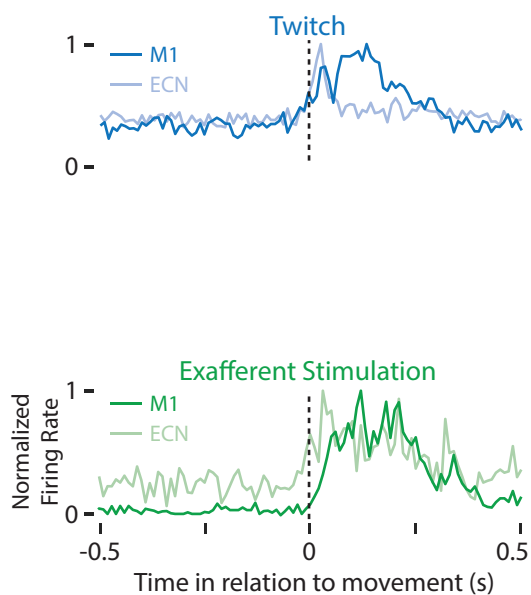**e**

P12

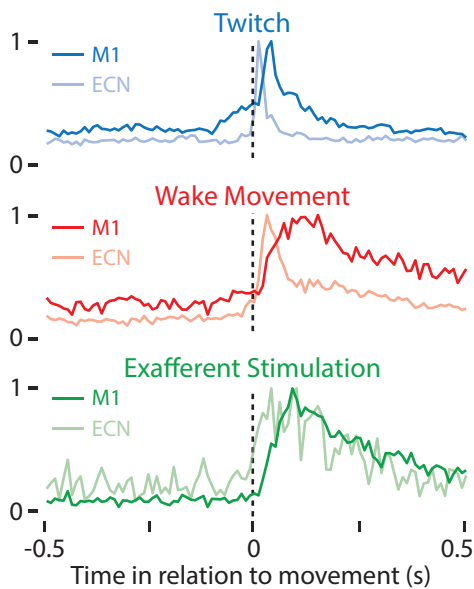**f**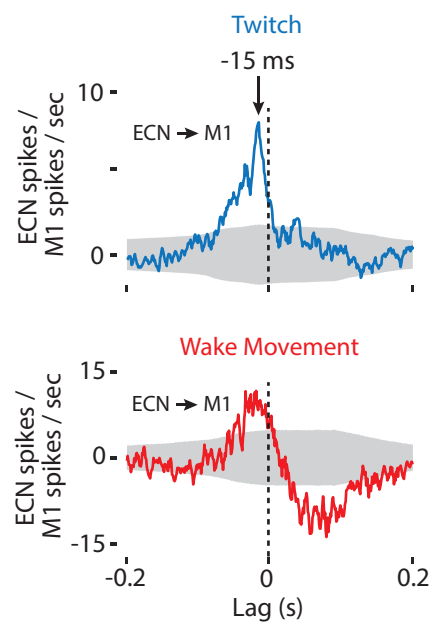

Supplement: supp [file elife-41841-supp-v1.zip › elife_poa_e41841_Figure_6_figure_supplement_1.pdf]

Twitches

Wake Movements

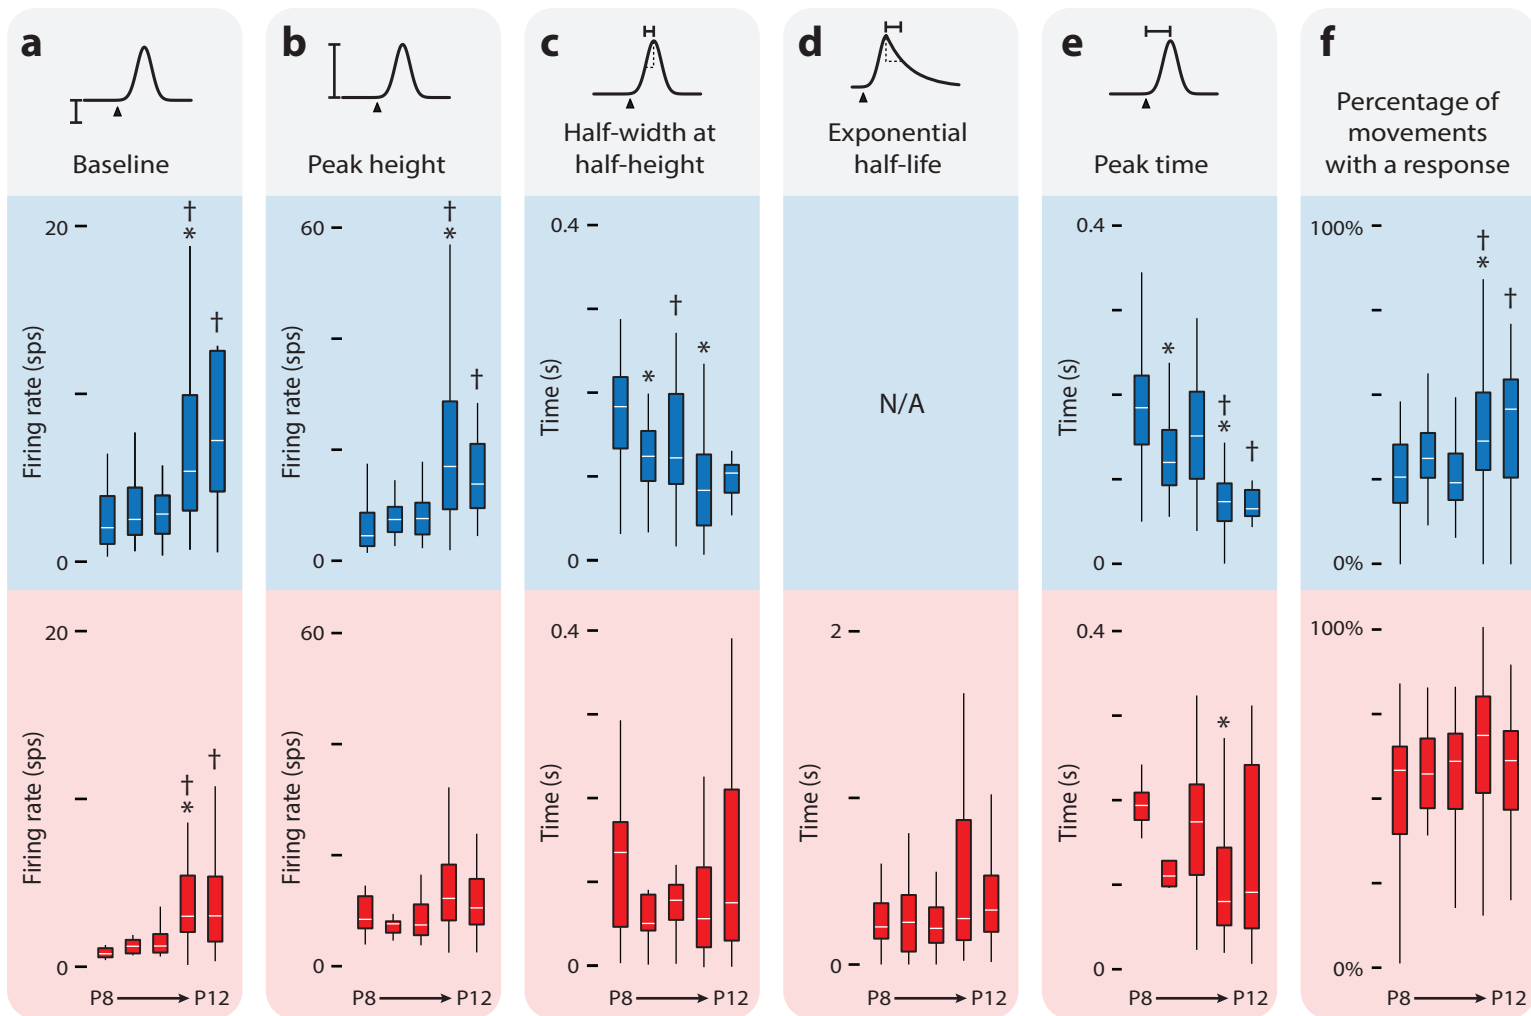

Supplement: supp [file elife_poa_e41841_Figure_3_figure_supplement_2.pdf › elife_poa_e41841_Figure_3_figure_supplement_2.pdf]
